# Supplementary material for: Oxidative Stress Response of Probiotic Strain Bifidobacterium longum subsp. longum GT15
Source: MDPI journal article supplement (doi:10.3390/foods12183356), 2023-09-07
Supplement: s1 [file s1]

**Table S1.** List of genes and their products with antioxidant functionality of bifidobacteria

| The product encoded by the gene                         | Antioxidant functionality                                                                                              | Gene                                                                            | Strain                                                                                                         | Reference                                                                                                          |
|---------------------------------------------------------|------------------------------------------------------------------------------------------------------------------------|---------------------------------------------------------------------------------|----------------------------------------------------------------------------------------------------------------|--------------------------------------------------------------------------------------------------------------------|
| Ferroxidase                                             | Iron chelation activity                                                                                                | BL01563                                                                         | <i>B. longum</i> NCC2705                                                                                       | [Kwak et al.,2016, Kot et al., 1994]                                                                               |
| Glutaredoxin<br>Glutaredoxin-like NrdH                  | Reduce dehydroascorbate, peroxiredoxins, and methionine sulfoxide reductase. Reduced non-enzymatically by glutathione. | <i>grxA</i> ,,<br><i>grx1</i> , <i>grxC2</i> ,<br><i>nrdH</i> ,<br>BBMN68_1397, | <i>B. longum</i> BBMN68,                                                                                       | [Elias et al., 2008, Xiao et al., 2011, Kwak et al.,2016]                                                          |
| Peroxideroxin (alkyl hydroperoxide reductase subunit C) | Reduces H <sub>2</sub> O <sub>2</sub> , organic peroxides and peroxyxynitrite                                          | <i>ahpC</i> ,<br>BL0615                                                         | <i>B. longum</i> NCC2705                                                                                       | [Xiao et al., 2011, Zuo et al., 2014, Klijn et al., 2005]                                                          |
| Peroxideroxin<br>OsmC family                            | Peroxidase activity with a strong preference for organic hydroperoxides                                                | BLI010_09070                                                                    | <i>B. infantis</i> JCM 7010                                                                                    | [Dubbs et al., 2007]                                                                                               |
| Peroxiredoxin Q/BCP                                     | Protein reduces and detoxifies hydroperoxides, shows substrate selectivity toward fatty acid hydroperoxides.           | LTBL16_000976,<br>BL0615                                                        | <i>B. longum</i> LTBL16,<br><i>B. longum</i> NCC2705,                                                          | [Kwak et al.,2016, Oberg, et al., 2016, Huang et al., 2020]                                                        |
| Thioredoxin                                             | Reduction of disulfide bonds of other proteins by cysteine thiol-disulfide exchange                                    | <i>trxA</i> , <i>B</i> ,<br>BBMN68_991,<br>BLD 0988                             | <i>B. longum</i> BBMN68,<br><i>B. longum</i> NCC2705                                                           | [Kwak et al.,2016, Lu et al.,2014, Xiao et al., 2011, Serata et al., 2012, Jia et al.,2017]                        |
| Thioredoxin reductase                                   | Reduction of oxidized thioredoxins and glutaredoxin -like NrdH protein .                                               | <i>trxB</i> ,<br>BL0164                                                         | <i>B. longum</i> BBMN68,<br><i>B. longum</i> LTBL16,<br><i>B. longum</i> NCC2705,<br><i>B. animalis lactis</i> | [Oberg, et al., 2016, Lu et al., 2014, Xiao et al., 2011, Klijn et al., 2005, Huang et al., 2020, Jia et al.,2017] |
| NAD(P)H oxidase                                         | Source of cellular reactive oxygen species, transfer electrons from NADPH to oxygen molecule.                          | <i>nox</i> ,<br>LTBL16_001911                                                   | <i>B. longum</i> LTBL16,                                                                                       | [O'Callaghan et al.,2016, Lu et al., 2014, Xiao et al., 2011, Serata et al., 2012, Jia et al.,2017]                |
| Dihydroorotate oxidase                                  | Generates H <sub>2</sub> O <sub>2</sub> -forming NADH                                                                  | <i>pyrK</i> ,                                                                   | <i>B. bifidum</i> CNCMI-4319                                                                                   | [Kawasaki et al.,2009, Jia                                                                                         |

|                                                                              |                                                                                                                                                                                                                                   |                                          |                                                        |                                               |
|------------------------------------------------------------------------------|-----------------------------------------------------------------------------------------------------------------------------------------------------------------------------------------------------------------------------------|------------------------------------------|--------------------------------------------------------|-----------------------------------------------|
|                                                                              | oxidase activity and indirect production of H <sub>2</sub> O <sub>2</sub> .                                                                                                                                                       | CNCMI_0917,<br><i>pyrD</i><br>CNCMI_0378 |                                                        | et al.,2017]                                  |
| Oxygen-dependent coproporphyrinogen III oxidase                              | Involved in detoxifying molecular oxygen and/or H <sub>2</sub> O <sub>2</sub>                                                                                                                                                     |                                          | <i>B. animalis lactis</i>                              | [Ruiz et al., 2012]                           |
| Possible Class I pyridine nucleotide-disulfideoxidoreductase (PNDR)          | Involve in the cellular oxidative stress response                                                                                                                                                                                 | BL1626,                                  | <i>B. longum</i> NCC 2705,<br><i>B. longum</i> BBMN68, | [Xiao et al., 2011, Delcardayre et al., 1998] |
| P-type ATPase                                                                | Transport of manganese to the bacterial cell                                                                                                                                                                                      | <i>mntP</i> ,<br>zntA1 BBMN68_1149       | <i>B. longum</i> BBMN68                                | [Xiao et al., 2011, Jia et al.,2017]          |
| Ferritin; ferroxidase;<br>DNA starvation/stationary phase protection protein | Enzymes catalyzes the oxidation of Fe <sup>2+</sup> ions by hydrogen peroxide, which prevents hydroxyl radical production by the Fenton reaction                                                                                  | <i>dps</i> ,                             | <i>B. longum</i> NCC2705                               | [Klijn et al., 2005, Zhai,et al., 2019]       |
| DsbA family oxidoreductase                                                   | Catalyzes intrachain disulfide bond formation as peptides emerge into the cell's periplasm                                                                                                                                        | <i>dsbA</i> ,                            | <i>B. longum</i> MCC00353                              | [Zhai,et al., 2019]<br>BioCyc                 |
| Ribonucleotide reductase                                                     | DNA oxidative damage-protective protein                                                                                                                                                                                           | <i>nrdA</i> ,<br>BL1752                  | <i>B. longum</i> BBMN68,<br><i>B. longum</i> D2957     | [Xiao et al., 2011, Oberg, et al., 2016]      |
| Nucleotide triphosphate pyrophosphohydrolases                                | DNA oxidative damage-protective proteins                                                                                                                                                                                          | <i>mutT1</i>                             | <i>B. longum</i> BBMN68                                | [Xiao et al., 2011]                           |
| NAD-dependent protein deacetylase of SIR2 family                             | Involved in the response to oxidative stress. NAD <sup>+</sup> -dependent deacetylation of $\sigma^H$ and transcription factor FOXO3a. Improve foxo-dependent transcription of antioxidant enzymes and reduce ROS levels in cells | <i>sir2</i> ,<br>LTBL16_002010           | <i>B. longum</i> LTBL16                                | [Halsey et al., 2004, Guo et al., 2017]       |

|                                                         |                                                                                                                                             |                                                 |                               |                          |
|---------------------------------------------------------|---------------------------------------------------------------------------------------------------------------------------------------------|-------------------------------------------------|-------------------------------|--------------------------|
| Linoleic acid isomerase                                 | Participates in linoleic acid metabolism. Conjugated linoleic acid metabolites exhibit the ability to protect cells from oxidative effects. | <i>lai</i> ,<br>CNCMI4319_0491                  | <i>B. bifidum</i> CNCM I-4319 | [Macdonald et al., 2000] |
| Cyclopropane-fatty-acyl-phospholipid synthase           | Catalyzes cyclopropane fatty acid (cell-surface component) biosynthesis                                                                     | BBMN68_1705,                                    | <i>B. longum</i> BBMN68,      | [Xiao et al., 2011]      |
| Hydroxycinnamic acid esterase                           | Release of hydroxycinnamates from plant-based dietary sources                                                                               | <i>caeA</i>                                     | <i>B. longum</i>              | [Kelly et al., 2018]     |
| S-adenosylhomocysteinase, S-ribosylhomocysteinase       | Synthesizes cysteine from methionine using homocysteine as an intermediate                                                                  | <i>ahcY</i> ,<br><i>luxS</i> ,<br>FC12_GL001705 | <i>Bifidobacterium</i> spp.,  | [Wada et al., 2021]      |
| Subtilisin-like serine protease, cell envelope protease | Catalyzes the cleavage of peptide bonds                                                                                                     | <i>aprE</i> ,<br><i>cep</i>                     | <i>B. longum</i> KACC91563    | [Chang et al., 2013]     |

## References

- Jia, F.-F.; Zhang, L.-J.; Pang, X.-H.; Gu, X.-X.; Abdelazez, A.; Liang, Y.; Sun, S.-R.; Meng, X.-C. Complete genome sequence of bacteriocin-producing *Lactobacillus plantarum* KLDS1.0391, a probiotic strain with gastrointestinal tract resistance and adhesion to the intestinal epithelial cells. *Genome*. **2017**, 109, 432–437.
- Kwak, W.; Kim, K.; Lee, C.; Lee, C.; Kang, J.; Cho, K.; Yoon, S.H.; Kang, D.K.; Kim, H.; Heo, J.; et al. Comparative analysis of the complete genome of *Lactobacillus plantarum* GB-LP2 and potential candidate genes for host immune system enhancement. *J. Microbiol. Biotechnol.* **2016**, 26, 684–692.
- Kot, E.; Haloftis, G.; Bezkorovainy, A. Iron accumulation by bifidobacteria at low pO<sub>2</sub> and in air: Action of putative ferrox-idase. *J. Agric. Food Chem.* **1994**, 42, 685–688.
- O’Callaghan, A.; van Sinderen, D. Bifidobacteria and their role as members of the human gut microbiota. *Front. Microbiol.* 2016, 7, 925
- Elias, R.J.; Kellerby, S.S.; Decker, E.A. Antioxidant activity of proteins and peptides. *Crit. Rev. Food Scien. Nutr.* **2008**, 48, 430–441.
- Xiao, M.; Xu, P.; Zhao, J.; Wang, Z.; Zuo, F.; Zhang, J.; Ren, F.; Li, P.; Chen, S.; Ma, H. Oxidative stress-related responses of *Bifidobacterium longum* subsp. *longum* BBMN68 at the proteomic level after exposure to oxygen. *Microbiology*. **2011**, 157, 1573–1588.

Zuo, F.; Yu, R.; Khaskheli, G.B.; Ma, H.; Chen, L.; Zeng, Z.; Mao, A.; Chen, S. Homologous overexpression of alkyl hydroperoxide reductase subunit C (ahpC) protects *Bifidobacterium longum* strain NCC2705 from oxidative stress. *Res. Microbiol.* **2014**, *165*, 581–589.

Klijn, A.; Mercenier, A.; Arigoni, F. Lessons from the genomes of *Bifidobacterium*. *FEMS Microbiol. Rev.* **2005**, *29*, 491–509.

Dubbs, J.M.; Mongkolsuk, S. Peroxiredoxins in Bacterial Antioxidant Defense. *Subcell. Biochem.* **2007**, *44*, 143–193.

Oberg, T.S.; Broadbent, J.R. Hydrogen Peroxide Resistance in *Bifidobacterium Animalis* Subsp. *Lactis* and *Bifidobacterium Longum*. In *Stress and Environmental Regulation of Gene Expression and Adaptation in Bacteria, II*; de Bruijn, F.J., Ed.; Wiley: New York, NY, USA, **2016**; *2*, 638–656.

Huang, G.; Pan, H.; Zhu, Z.; Li, Q. The complete genome sequence of *Bifidobacterium longum* LTBL16, a potential probiotic strain from healthy centenarians with strong antioxidant activity. *Genome.* **2020**, *112*, 769–773.

Serata, M.; Iino, T.; Yasuda, E.; Sako, T. Roles of thioredoxin and thioredoxin reductase in the resistance to oxidative stress in *Lactobacillus casei*. *Microbiology.* **2012**, *158*, 953–962.

Kawasaki, S.; Satoh, T.; Todoroki, M.; Nimura, Y. b-Type Dihydroorotate Dehydrogenase Is Purified as a H<sub>2</sub>O<sub>2</sub>-Forming NADH Oxidase from *Bifidobacterium bifidum*. *Appl. Environ. Microbiol.* **2009**, *75*, 629–636.

Ruiz, L.; Gueimonde, M.; Ruas-Madiedo, P.; Ribbera, A.; de los Reyes-Gavilán, C.G.; Ventura, M.; Margolles, A.; Sánchez, B. Molecular clues to understand the aerotolerance phenotype of *Bifidobacterium animalis* subsp. *lactis*. *Appl. Environ. Microbiol.* **2012**, *78*, 644–650.

Delcardayre, S.B.; Davies, J.E. Staphylococcus aureus coenzyme A disulfide reductase, a new subfamily of pyridine nucleotide-disulfide oxidoreductase. Sequence, expression, and analysis of *cdr*. *J. Biol. Chem.* **1998**, *273*, 5752–5757.

Oberg, T.S.; Warda, R.E.; Steele, J.L.; Broadbent, J.R. Transcriptome analysis of *Bifidobacterium longum* strains that show a differential response to hydrogen peroxide stress. *J. Biotechn.* **2015**, *212*, 58–64.

Halsey, T.A.; Vazquez-Torres, A.; Gravidahl, D.J.; Fang, F.C.; Libby, S.J. The Ferritin-Like Dps Protein Is Required for *Salmonella enterica* Serovar Typhimurium Oxidative Stress Resistance and Virulence. *Amer. Soc. Microbiol. Infect. Immun.* **2004**, *72*, 1155–1158.

Guo, Q.; Li, S.; Xie, Y.; Zhang, Q.; Liu, M.; Xu, Z.; Sun, H.; Yang, Y. The NAD<sup>+</sup>-dependent deacetylase, *Bifidobacterium longum* Sir2 in response to oxidative stress by deacetylating SigH (σH) and FOXO3a in *Bifidobacterium longum* and HEK293T cell respectively. *Free Radic. Biol. Med.* **2017**, *108*, 929–939.

MacDonald H.B. Conjugated Linoleic Acid and Disease Prevention: A Review of Current Knowledge. *J. Amer. Coll. of Nutr.* **2000**, *19*, 1115–1185.

Kelly, S.M.; O’Callaghan, J.; Kinsella, M.; Van Sinderen, D. Characterisation of a Hydroxycinnamic Acid Esterase from the *Bifidobacterium longum* subsp. *longum* Taxon. *Front. Microbiol.* **2018**, *9*, 2690.

Wada, M.; Fukiya, S.; Suzuki, A.; Matsumoto, N.; Matsuo, M.; Yokota, A. Methionine utilization by bifidobacteria: Possible existence of a reverse transsulfuration pathway. *Biosci. Microbiota Food Health.* **2021**, *40*, 80–83.

Chang, O.; Seol, K.-H.; Jeong, S.-G.; Oh, M.-H.; Park, B.-Y.; Perrin, C.; Ham, J.-S. Casein hydrolysis by *Bifidobacterium longum* KACC91563 and antioxidant activities of peptides derived therefrom. *J. Dairy Sci.* **2013**, *96*, 5544–5555.

**Table S2.** Catalog the orthologs antioxidant genes of *B. longum*

| Enzyme name                                             | Number of orthologs |
|---------------------------------------------------------|---------------------|
| Alkyl hydroperoxide reductase AhpC                      | 6                   |
| Alkyl hydroperoxide reductase AhpF                      | 6                   |
| Class I pyridine nucleotide-disulfide oxidoreductase    | 3                   |
| Cobalamin-independent methionine synthase II            | 9                   |
| DSBA oxidoreductase                                     | 9                   |
| Dihydroorotate dehydrogenase                            | 9                   |
| Glutaredoxin grxC2 (nrdH)                               | 7                   |
| Glutathione import ATP-binding protein GsiA             | 8                   |
| Hydroxycinnamic acid esterase CaeA - carboxylesterase A | 4                   |
| Linoleic acid isomerase                                 | 5                   |
| NADH oxidase                                            | 11                  |
| Oxygen-dependent coproporphyrinogen III oxidase         | 9                   |
| P-type ATPase                                           | 9                   |
| Peptidase O pepO                                        | 9                   |
| Permease                                                | 5                   |
| Peroxiredoxin                                           | 5                   |
| Polyphosphate kinase Ppk                                | 9                   |
| Pyrophosphohydrolase MutT1                              | 9                   |
| Ribonucleotide reductase NrdA                           | 6                   |
| Subtilisin-like serine protease                         | 2                   |
| Superoxide dismutase SodB                               | 12                  |
| Superoxide dismutase SodC                               | 11                  |
| Thioredoxin                                             | 4                   |
| Thioredoxin domain protein                              | 9                   |
| Thioredoxin peroxidase                                  | 7                   |
| Thioredoxin reductase                                   | 14                  |
| Thioredoxin reductase-like protein                      | 6                   |

**Table S3.** Distribution genes of antioxidant functionality in the genomes of *B. longum*

[illegible]

|                                                        |   |   |   |   |   |   |   |   |   |   |
|--------------------------------------------------------|---|---|---|---|---|---|---|---|---|---|
| <i>B. longum</i> subsp. <i>longum</i> strain AH1206    | + | + | + | + | + | + | + | + | + | + |
| <i>B. longum</i> subsp. <i>longum</i> strain BORI      | + | + | + | + | + | + | + | + | + | + |
| <i>B. longum</i> subsp. <i>longum</i> strain CCUG30698 | + | + | + | + | + | + | + | - | + | + |
| <i>B. longum</i> subsp. <i>longum</i> strain JCM 11340 | + | + | + | + | + | + | + | + | + | + |
| <i>B. longum</i> subsp. <i>longum</i> strain JCM 11341 | + | + | + | + | + | + | + | + | + | + |
| <i>B. longum</i> subsp. <i>longum</i> strain JCM 11342 | + | + | + | + | + | + | + | + | + | + |
| <i>B. longum</i> subsp. <i>longum</i> strain JCM 11343 | + | + | + | + | + | + | + | + | + | + |
| <i>B. longum</i> subsp. <i>longum</i> strain JCM 7050  | + | + | + | + | + | + | + | + | + | + |
| <i>B. longum</i> subsp. <i>longum</i> strain JCM 7052  | + | + | + | + | + | + | + | + | + | + |
| <i>B. longum</i> subsp. <i>longum</i> strain JCM 7053  | + | + | + | + | + | + | + | + | + | + |
| <i>B. longum</i> subsp. <i>longum</i> strain KCTC 3128 | + | + | + | + | + | + | + | + | + | + |
| <i>B. longum</i> subsp. <i>longum</i> strain KCTC 3421 | + | + | + | + | + | + | + | + | + | + |
| <i>B. longum</i> subsp. <i>longum</i> strain KCTC 5914 | + | + | + | + | + | + | + | + | + | + |
| <i>B. longum</i> subsp. <i>longum</i> strain NCIMB8809 | + | + | + | + | + | + | + | + | + | + |

**Table S3 (Continued).** Distribution genes of antioxidant functionality in the genomes of *B. longum*

| Strain                                   | Permease | Peroxi redoxin | Subtilisin-like<br>serine protease | Thioredoxin<br>domain protein | Thioredoxin<br>peroxidase | Thioredoxin<br>reductase | Thioredoxin<br>reductase-like<br>protein |
|------------------------------------------|----------|----------------|------------------------------------|-------------------------------|---------------------------|--------------------------|------------------------------------------|
| <i>B. longum</i> DJO10A                  | -        | +              | +                                  | +                             | +                         | +                        | +                                        |
| <i>B. longum</i> isolate MGYG-HGUT-01292 | +        | +              | -                                  | +                             | +                         | +                        | +                                        |
| <i>B. longum</i> NCC2705                 | -        | +              | +                                  | +                             | +                         | +                        | +                                        |
| <i>B. longum</i> strain 105-A            | -        | +              | +                                  | +                             | +                         | +                        | +                                        |
| <i>B. longum</i> strain 35624            | -        | +              | +                                  | +                             | +                         | +                        | +                                        |
| <i>B. longum</i> strain 51A              | -        | +              | +                                  | +                             | +                         | +                        | +                                        |
| <i>B. longum</i> strain BAMA-B05         | -        | +              | +                                  | +                             | +                         | +                        | +                                        |
| <i>B. longum</i> strain BG7              | -        | +              | +                                  | +                             | +                         | +                        | +                                        |
| <i>B. longum</i> strain BIM B-813D       | -        | +              | +                                  | +                             | +                         | +                        | +                                        |
| <i>B. longum</i> strain BXY01            | -        | +              | -                                  | +                             | -                         | +                        | +                                        |

|                                                        |   |   |   |   |   |   |   |
|--------------------------------------------------------|---|---|---|---|---|---|---|
| <i>B. longum</i> strain CACC 517                       | - | + | + | + | + | + | + |
| <i>B. longum</i> strain HN001                          | - | + | + | + | + | + | + |
| <i>B. longum</i> strain Jih1                           | - | + | + | + | + | + | + |
| <i>B. longum</i> strain JSRL02                         | - | + | + | + | + | + | + |
| <i>B. longum</i> K15                                   | - | + | + | + | + | + | + |
| <i>B. longum</i> strain K5                             | - | + | + | + | + | + | + |
| <i>B. longum</i> strain LC67                           | - | + | + | + | + | + | + |
| <i>B. longum</i> strain LTBL16                         | - | + | + | + | + | + | + |
| <i>B. longum</i> strain NCTC11818                      | - | + | + | + | + | + | + |
| <i>B. longum</i> strain ZJ1                            | - | + | + | + | + | + | + |
| <i>B. longum</i> subsp. <i>longum</i> BBMN68           | - | + | + | + | + | + | + |
| <b><i>B. longum</i> subsp. <i>longum</i> GT15</b>      | - | + | + | + | + | + | + |
| <i>B. longum</i> subsp. <i>longum</i> JCM 1217         | - | + | + | + | + | + | + |
| <i>B. longum</i> subsp. <i>longum</i> JDM301           | - | + | - | + | - | + | + |
| <i>B. longum</i> subsp. <i>longum</i> KACC 91563       | - | + | + | + | + | + | + |
| <i>B. longum</i> subsp. <i>longum</i> strain AH1206    | - | + | + | + | + | + | + |
| <i>B. longum</i> subsp. <i>longum</i> strain BORI      | - | + | + | + | + | + | + |
| <i>B. longum</i> subsp. <i>longum</i> strain CCUG30698 | - | + | + | + | + | + | + |
| <i>B. longum</i> subsp. <i>longum</i> strain JCM 11340 | - | + | + | + | + | + | + |
| <i>B. longum</i> subsp. <i>longum</i> strain JCM 11341 | - | + | + | + | + | + | + |
| <i>B. longum</i> subsp. <i>longum</i> strain JCM 11342 | - | + | + | + | + | + | + |
| <i>B. longum</i> subsp. <i>longum</i> strain JCM 11343 | - | + | + | + | + | + | + |
| <i>B. longum</i> subsp. <i>longum</i> strain JCM 7050  | - | + | + | + | + | + | + |
| <i>B. longum</i> subsp. <i>longum</i> strain JCM 7052  | - | + | + | + | + | + | + |
| <i>B. longum</i> subsp. <i>longum</i> strain JCM 7053  | - | + | + | + | + | + | + |
| <i>B. longum</i> subsp. <i>longum</i> strain KCTC 3128 | - | + | + | + | + | + | + |
| <i>B. longum</i> subsp. <i>longum</i> strain KCTC 3421 | + | + | + | + | + | + | + |
| <i>B. longum</i> subsp. <i>longum</i> strain KCTC 5914 | - | + | + | + | + | + | + |
| <i>B. longum</i> subsp. <i>longum</i> strain NCIMB8809 | - | + | + | + | + | + | + |
| <i>B. longum</i> subsp. <i>longum</i> strain YS108R    | - | + | + | + | + | + | + |

---

**Table S4.** Parameters of the analyzed transcriptomic samples

| Sample name | Raw samples     |               | Trimmed samples |               |
|-------------|-----------------|---------------|-----------------|---------------|
|             | Size, mln reads | Size, blnb.p. | Size, mln reads | Size, blnb.p. |
| BL1         | 30.0            | 3.0           | 28.7            | 2.5           |
| BL2         | 32.2            | 3.2           | 30.7            | 2.7           |
| BL3         | 26.6            | 2.7           | 24.5            | 2.3           |
| BL4         | 30.5            | 3.1           | 29.1            | 2.6           |
| BL5         | 30.4            | 3.1           | 29.2            | 2.6           |

**Table S5.** The total number of upregulated transcripts in cells of *B. longum* GT15 under the action of a certain oxidative stress factor

| <b>Total transcripts*</b>                 | <b>Response to H<sub>2</sub>O<sub>2</sub></b> | <b>Response to O<sub>2</sub> 2 h</b> | <b>Response to O<sub>2</sub> 4 h</b> |
|-------------------------------------------|-----------------------------------------------|--------------------------------------|--------------------------------------|
| Response to H <sub>2</sub> O <sub>2</sub> | <b>190</b>                                    | 52                                   | 52                                   |
| Response to O <sub>2</sub> 2 h            | 58                                            | <b>117</b>                           | 52                                   |
| Response to O <sub>2</sub> 4 h            | 72                                            | 99                                   | <b>177</b>                           |

\* results are expressed as more 2-fold change after oxidative stress compared to control (untreated) cells

**Table S6.** The total number of detected proteins in increased level in cells of *B. longum* GT15 under the action of a certain oxidative stress factor

| <b>Total proteins*</b>                    | <b>Response to H<sub>2</sub>O<sub>2</sub></b> | <b>Response to O<sub>2</sub> 2 h</b> | <b>Response to O<sub>2</sub> 4 h</b> |
|-------------------------------------------|-----------------------------------------------|--------------------------------------|--------------------------------------|
| Response to H <sub>2</sub> O <sub>2</sub> | <b>13</b>                                     | 5                                    | 3                                    |
| Response to O <sub>2</sub> 2 h            | 5                                             | <b>19</b>                            | 13                                   |
| Response to O <sub>2</sub> 4 h            | 3                                             | 13                                   | <b>14</b>                            |

\* results are expressed as more 2-fold change after oxidative stress compared to control (untreated) cells

**Table S7.** The total number of common transcripts and proteins in increased level in cells of *B. longum* GT15 under the action of a certain oxidative stress factor

| <b>Total proteins/transcripts*</b>        | <b>Response to H<sub>2</sub>O<sub>2</sub></b> | <b>Response to O<sub>2</sub> 2 h</b> | <b>Response to O<sub>2</sub> 4 h</b> |
|-------------------------------------------|-----------------------------------------------|--------------------------------------|--------------------------------------|
| Response to H <sub>2</sub> O <sub>2</sub> | <b>8</b>                                      | 2                                    | 3                                    |
| Response to O <sub>2</sub> 2 h            | 2                                             | <b>14</b>                            | 10                                   |
| Response to O <sub>2</sub> 4 h            | 3                                             | 10                                   | <b>13</b>                            |

\* results are expressed as more 2-fold change after oxidative stress compared to control (untreated) cells

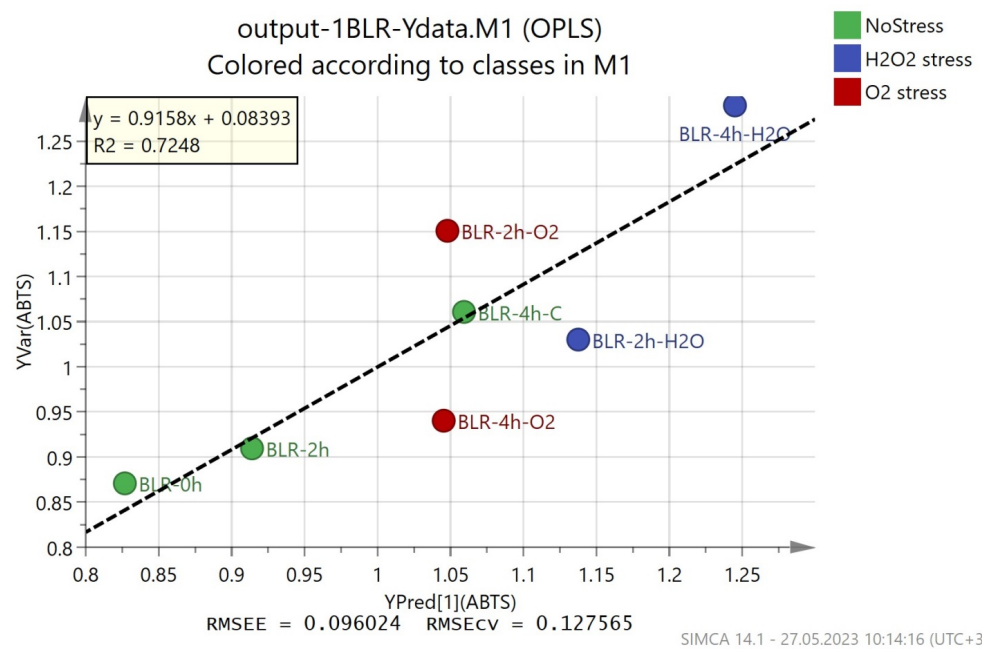

**Figure S1.** OPLS regression models on metabolic fingerprints of *B. longum* GT15 cells and their antioxidant activity (ABTS•+ method).

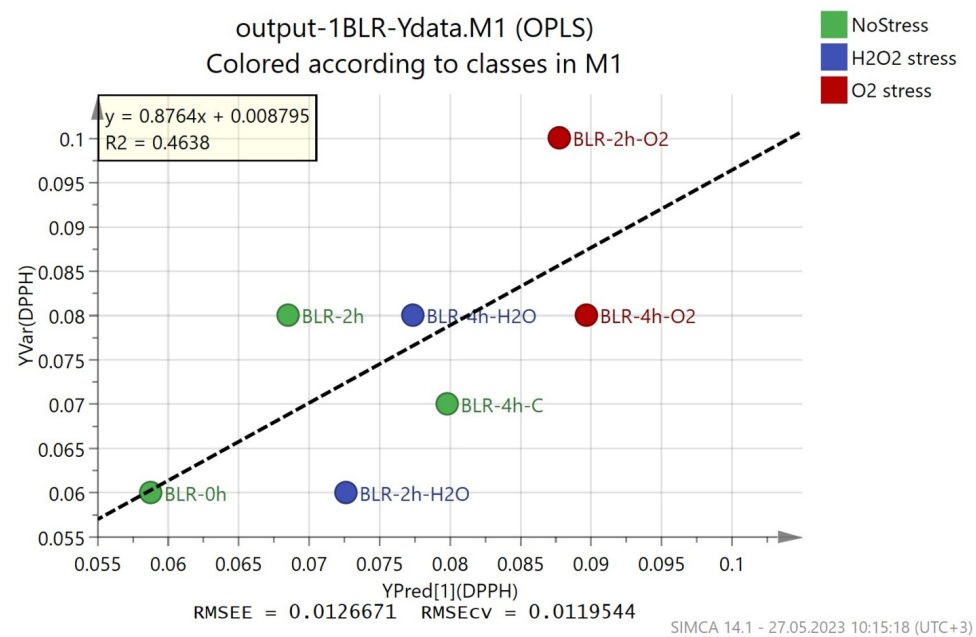

**Figure S2.** OPLS regression models on metabolic fingerprints of *B. longum* GT15 cells and their antioxidant activity (DPPH• method).

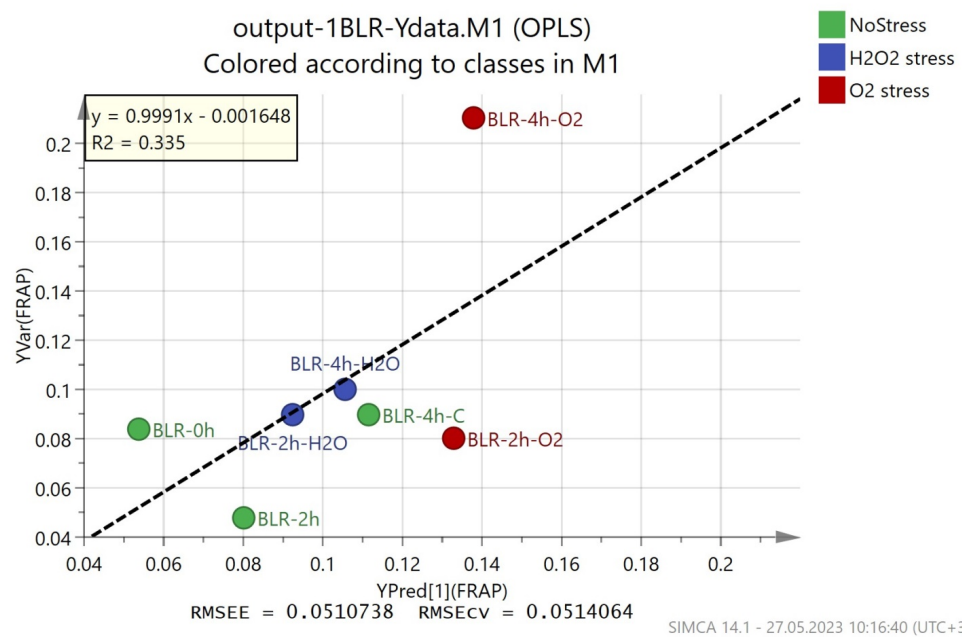

**Figure S3.** OPLS regression models on metabolic fingerprints of *B. longum* GT15 cells and their antioxidant activity (FRAP method).
